# Supplementary material for: Chemometric and green metric strategies for sustainable analytical methods: phenolic compounds in lettuce-NADES extracts
Source: Royal Society of Chemistry journal article supplement (doi:10.1039/d0ay02318c), 2021-01-01
Supplement: d0ay02318c1.pdf [file d0ay02318c1.pdf]

**-Electronic Supplementary Information-**

**Chemometric and green metrics strategies for sustainable analytical methods: phenolic  
compounds in lettuce-NADES extracts**

Romina Canales<sup>a</sup>, Magdalena Espino<sup>a</sup>, Sergio Pasini<sup>a</sup>, María Fernanda Silva<sup>a,\*</sup>

<sup>a</sup> *Instituto de Biología Agrícola de Mendoza (IBAM-CONICET), Facultad de Ciencias Agrarias, Universidad Nacional de Cuyo, Mendoza, Argentina.*

\*Corresponding author:

E-mail address: msilva@fca.uncu.edu.ar (M.F. Silva)

Phone: +54-0261-4135000 (\*1317)

**Table S1.** Experiments and responses of the PCs in the BBD design.

| Run | A                                         | B          | C                | Peak area (mAU) |        |        |        |         |        |
|-----|-------------------------------------------|------------|------------------|-----------------|--------|--------|--------|---------|--------|
|     | Plant/solvent ratio (mg L <sup>-1</sup> ) | Time (min) | Temperature (°C) | Rut             | Caf    | Clor   | Van    | Fer     | Gal    |
| 1   | 10                                        | 60         | 55               | 0.0483          | 1.4417 | 0.9695 | 2.8490 | 9.24680 | 0.2923 |
| 2   | 60                                        | 35         | 30               | 0.0796          | 2.7671 | 0.6018 | 2.8881 | 70.3243 | 0.1356 |
| 3   | 10                                        | 35         | 80               | 0.0287          | 2.1737 | 0.2785 | 3.0737 | 25.9524 | 0.1969 |
| 4   | 35                                        | 35         | 55               | 0.0916          | 3.5689 | 1.1103 | 3.4558 | 70.0788 | 0.2319 |
| 5   | 60                                        | 35         | 80               | 0.0940          | 3.2958 | 0.8761 | 3.0462 | 65.3412 | 0.2085 |
| 6   | 35                                        | 35         | 55               | 0.1004          | 3.5251 | 1.1812 | 3.4384 | 70.0160 | 0.2157 |
| 7   | 60                                        | 10         | 55               | 0.0780          | 3.1702 | 0.8315 | 2.9972 | 37.8805 | 0.2276 |
| 8   | 35                                        | 35         | 55               | 0.1227          | 3.3722 | 0.9186 | 3.2299 | 62.4343 | 0.2069 |
| 9   | 35                                        | 35         | 55               | 0.0868          | 3.7270 | 1.2101 | 3.3149 | 70.5697 | 0.2233 |
| 10  | 35                                        | 60         | 30               | 0.0771          | 3.3240 | 0.8179 | 2.6102 | 42.2561 | 0.2257 |
| 11  | 60                                        | 60         | 55               | 0.0101          | 1.6286 | 0.9857 | 2.5044 | 39.7263 | 0.2192 |
| 12  | 35                                        | 10         | 30               | 0.0784          | 3.3087 | 0.6390 | 2.9876 | 31.0792 | 0.2003 |
| 13  | 35                                        | 35         | 55               | 0.0775          | 2.8150 | 0.9341 | 3.1529 | 26.9130 | 0.2241 |
| 14  | 10                                        | 35         | 30               | 0.0273          | 2.5431 | 1.2202 | 2.7902 | 49.2424 | 0.2304 |
| 15  | 35                                        | 10         | 80               | 0.0883          | 2.8953 | 0.4931 | 2.7071 | 6.54490 | 0.2117 |
| 16  | 35                                        | 60         | 80               | 0.0687          | 3.2712 | 0.3729 | 3.1648 | 5.42800 | 0.2162 |
| 17  | 10                                        | 10         | 55               | 0.0191          | 3.7832 | 0.5124 | 2.8153 | 6.02860 | 0.1943 |

**Fig S1.** Values obtained from the desirability function for each phenolic compound considering the significant variables under study. Optimal condition: A): plant/solvent ratio (35.5 mg mL<sup>-1</sup>), B): Extraction time (36 min), and C): Extraction temperature (30 °C).

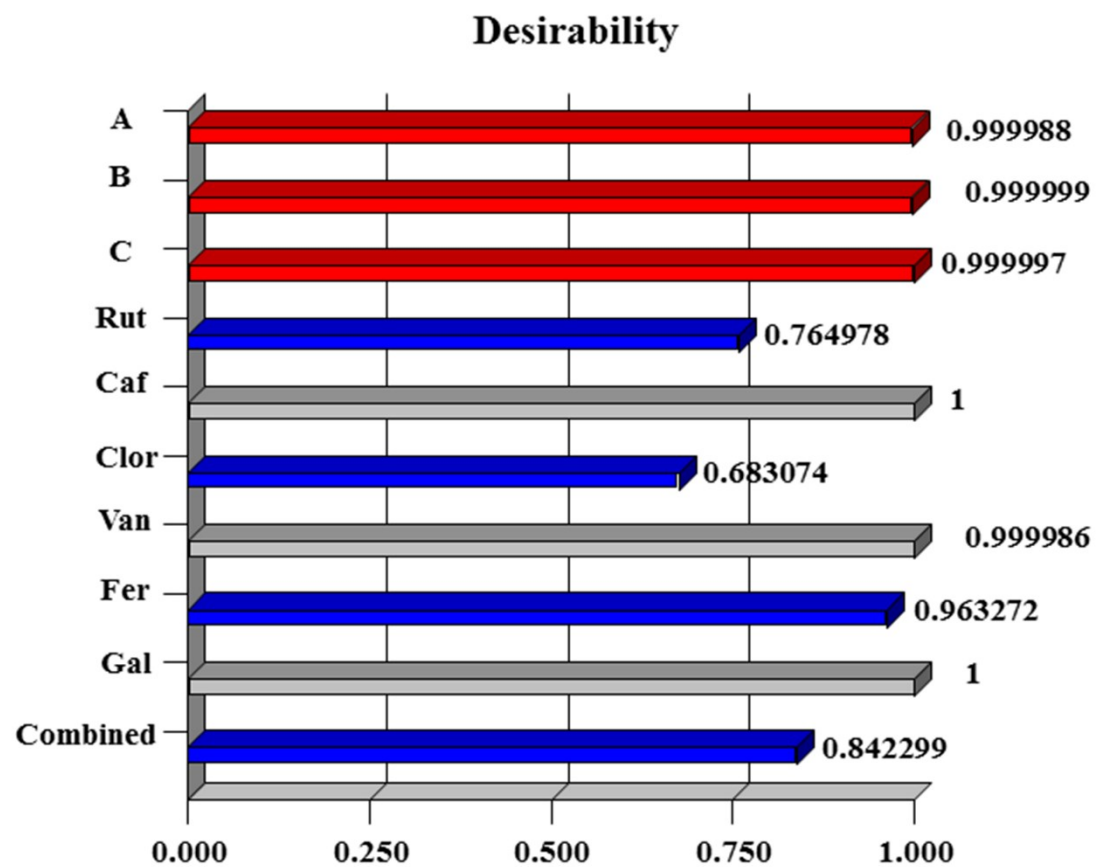

**Fig. S2A.** Analytical Greenness report summary of the present work.

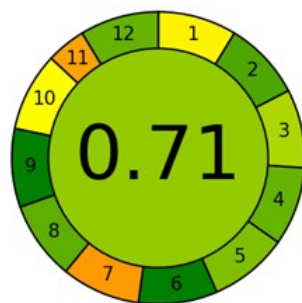

| Criteria                                                                                                                             | Score | Weight |
|--------------------------------------------------------------------------------------------------------------------------------------|-------|--------|
| 1. Direct analytical techniques should be applied to avoid sample treatment.                                                         | 0.48  | 2      |
| 2. Minimal sample size and minimal number of samples are goals.                                                                      | 0.85  | 2      |
| 3. If possible, measurements should be performed in situ.                                                                            | 0.66  | 2      |
| 4. Integration of analytical processes and operations saves energy and reduces the use of reagents.                                  | 0.8   | 2      |
| 5. Automated and miniaturized methods should be selected.                                                                            | 0.75  | 2      |
| 6. Derivatization should be avoided.                                                                                                 | 1.0   | 2      |
| 7. Generation of a large volume of analytical waste should be avoided, and proper management of analytical waste should be provided. | 0.31  | 2      |
| 8. Multi-analyte or multi-parameter methods are preferred versus methods using one analyte at a time.                                | 0.82  | 2      |
| 9. The use of energy should be minimized.                                                                                            | 1.0   | 2      |
| 10. Reagents obtained from renewable sources should be preferred.                                                                    | 0.5   | 2      |
| 11. Toxic reagents should be eliminated or replaced.                                                                                 | 0.31  | 1      |
| 12. Operator's safety should be increased.                                                                                           | 0.8   | 2      |

**Fig. S2B.** Analytical Greenness report summary of Viacava et al. 2018.

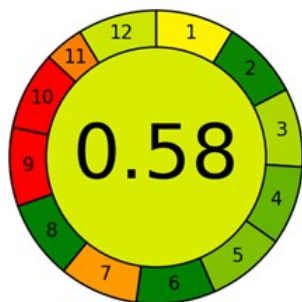

| Criteria                                                                                                                             | Score | Weight |
|--------------------------------------------------------------------------------------------------------------------------------------|-------|--------|
| 1. Direct analytical techniques should be applied to avoid sample treatment.                                                         | 0.48  | 2      |
| 2. Minimal sample size and minimal number of samples are goals.                                                                      | 0.98  | 2      |
| 3. If possible, measurements should be performed in situ.                                                                            | 0.66  | 2      |
| 4. Integration of analytical processes and operations saves energy and reduces the use of reagents.                                  | 0.8   | 2      |
| 5. Automated and miniaturized methods should be selected.                                                                            | 0.75  | 2      |
| 6. Derivatization should be avoided.                                                                                                 | 1.0   | 2      |
| 7. Generation of a large volume of analytical waste should be avoided, and proper management of analytical waste should be provided. | 0.31  | 2      |
| 8. Multi-analyte or multi-parameter methods are preferred versus methods using one analyte at a time.                                | 1.0   | 2      |
| 9. The use of energy should be minimized.                                                                                            | 0.0   | 2      |
| 10. Reagents obtained from renewable sources should be preferred.                                                                    | 0.0   | 2      |
| 11. Toxic reagents should be eliminated or replaced.                                                                                 | 0.25  | 1      |
| 12. Operator's safety should be increased.                                                                                           | 0.6   | 2      |

**Fig. S2C.** Analytical Greenness report summary of Yang et al. 2018.

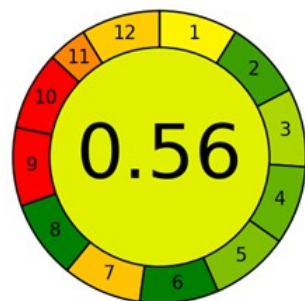

| Criteria                                                                                                                             | Score | Weight |
|--------------------------------------------------------------------------------------------------------------------------------------|-------|--------|
| 1. Direct analytical techniques should be applied to avoid sample treatment.                                                         | 0.48  | 2      |
| 2. Minimal sample size and minimal number of samples are goals.                                                                      | 0.88  | 2      |
| 3. If possible, measurements should be performed in situ.                                                                            | 0.66  | 2      |
| 4. Integration of analytical processes and operations saves energy and reduces the use of reagents.                                  | 0.8   | 2      |
| 5. Automated and miniaturized methods should be selected.                                                                            | 0.75  | 2      |
| 6. Derivatization should be avoided.                                                                                                 | 1.0   | 2      |
| 7. Generation of a large volume of analytical waste should be avoided, and proper management of analytical waste should be provided. | 0.39  | 2      |
| 8. Multi-analyte or multi-parameter methods are preferred versus methods using one analyte at a time.                                | 1.0   | 2      |
| 9. The use of energy should be minimized.                                                                                            | 0.0   | 2      |
| 10. Reagents obtained from renewable sources should be preferred.                                                                    | 0.0   | 2      |
| 11. Toxic reagents should be eliminated or replaced.                                                                                 | 0.27  | 1      |
| 12. Operator's safety should be increased.                                                                                           | 0.4   | 2      |
